# Supplementary material
Source: PubMed Central journal article supplement (PMC5292765)
Supplement: NIHMS844012-supplement-supplement_1.pdf [file NIHMS844012-supplement-supplement_1.pdf]

eTable 1. Non-Hispanic White Middle-Age Mortality and Economic Mobility: Men

|                          |                             |
|--------------------------|-----------------------------|
| Economic Mobility X Year | 0.501<br>[0.169 , 0.833]    |
| Gini Index               | 0.009<br>[-0.018 , 0.037]   |
| Income Per Capita (log)  | 0.007<br>[-0.062 , 0.077]   |
| College Graduates        | -0.306<br>[-0.381 , -0.231] |
| Population Density (log) | -1.187<br>[-4.273 , 1.898]  |
| Proportion Married       | -0.009<br>[-0.047 , 0.029]  |
| Unemployment Rate        | -0.023<br>[-0.059 , 0.012]  |
| Poverty Rate             | 0.006<br>[-0.033 , 0.045]   |
| Population (log)         | 0.916<br>[-1.774 , 3.606]   |
| Year                     | 0.077<br>[-0.089 , 0.244]   |
| Constant                 | 6.363<br>[5.895 , 6.831]    |
| Observations             | 4,713                       |
| R-squared                | 0.912                       |

Notes: 95% confidence intervals computed with standard errors corrected for clustering at the county level in brackets.

eTable 2. Non-Hispanic White Middle-Age Mortality and Economic Mobility: Women

|                          |                              |
|--------------------------|------------------------------|
| Economic Mobility X Year | 0.691<br>[0.310 , 1.072 ]    |
| Gini Index               | -0.051<br>[-0.092 , -0.011 ] |
| Income Per Capita (log)  | -0.018<br>[-0.097 , 0.061 ]  |
| College Graduates        | -0.348<br>[-0.437 , -0.259 ] |
| Population Density (log) | -0.828<br>[-3.649 , 1.992 ]  |
| Proportion Married       | -0.043<br>[-0.088 , 0.001 ]  |
| Unemployment Rate        | -0.017<br>[-0.056 , 0.022 ]  |
| Poverty Rate             | 0.045<br>[-0.007 , 0.097 ]   |
| Population (log)         | 0.786<br>[-1.680 , 3.253 ]   |
| Year                     | 0.114<br>[-0.058 , 0.287 ]   |
| Constant                 | 5.665<br>[5.176 , 6.154 ]    |
| Observations             | 3,966                        |
| R-squared                | 0.894                        |

Notes: 95% confidence intervals computed with standard errors corrected for clustering at the county level in brackets.
